# Supplementary material
Source: publisher site journal article supplement (https://www.dovepress.com/article/448691)
Supplement: Supplementary file 1 [file get_supplementary_file.php]

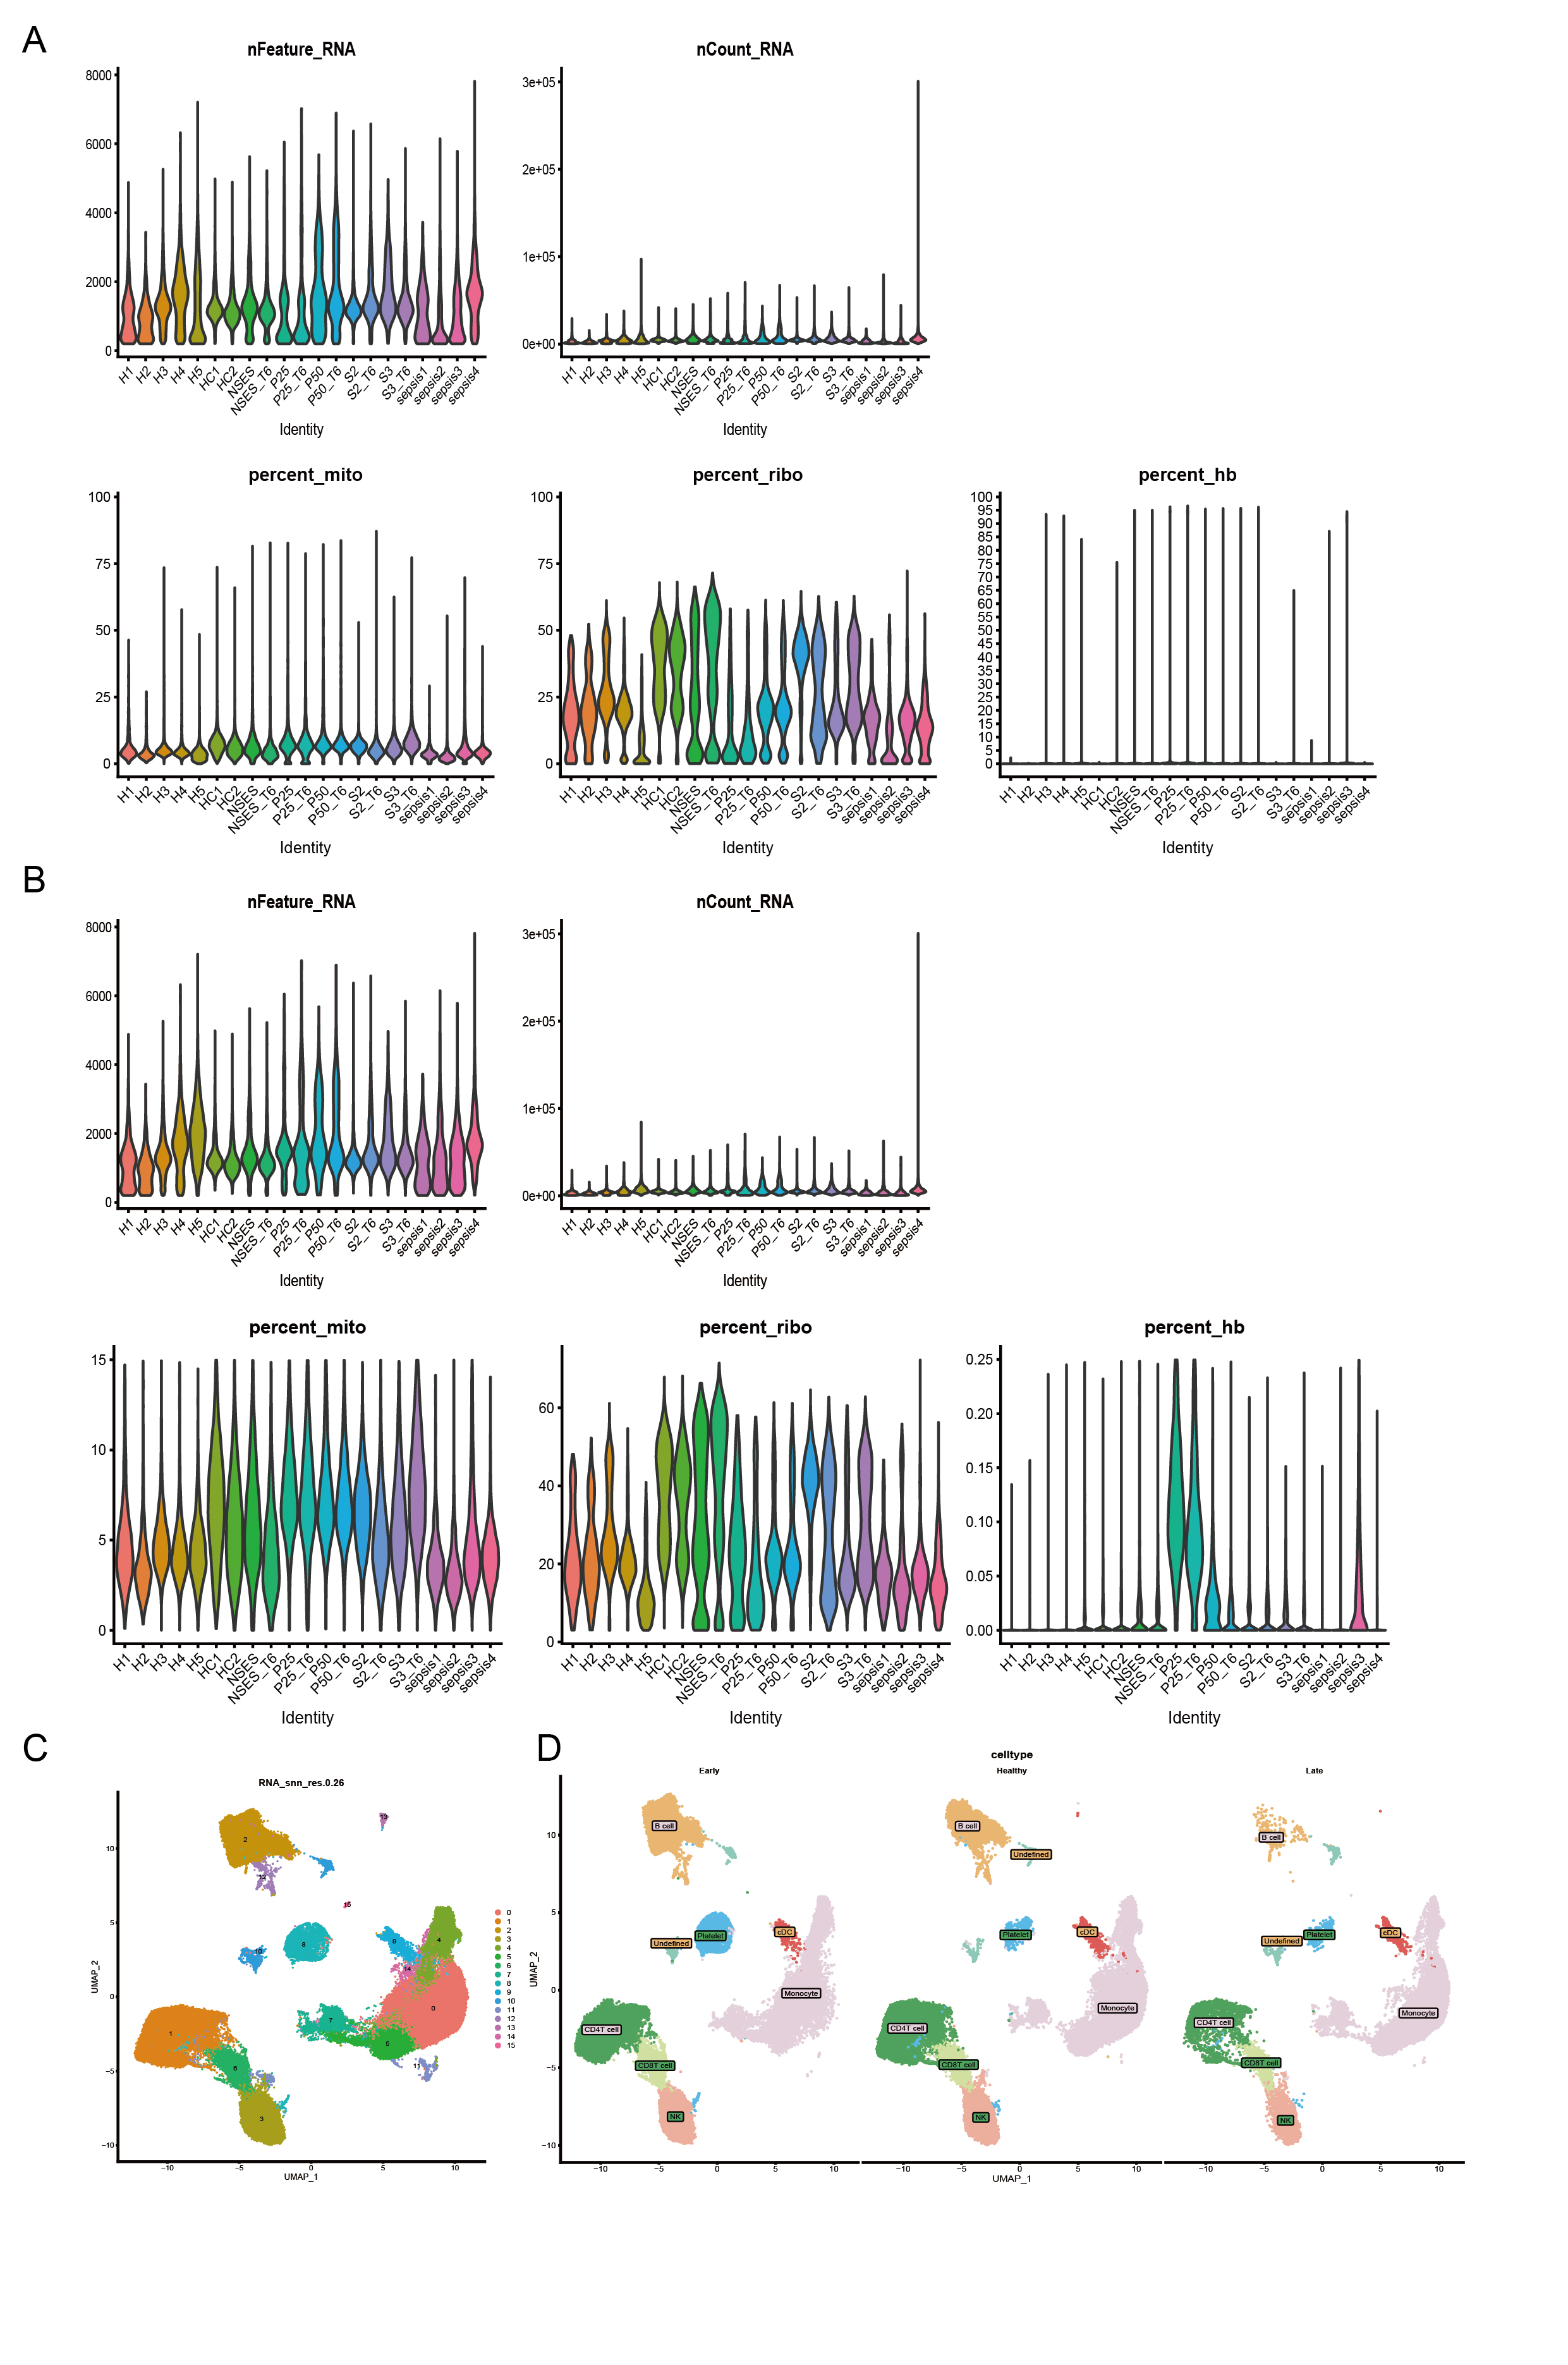


**Supplementary Figure 1:** Single-cell data QC. A: Single-cell data QC before censoring. B: Single-cell data QC after censoring. C: Clustering with a resolution of 0.26. D: Single-cell UMAP plots between the three clusters.


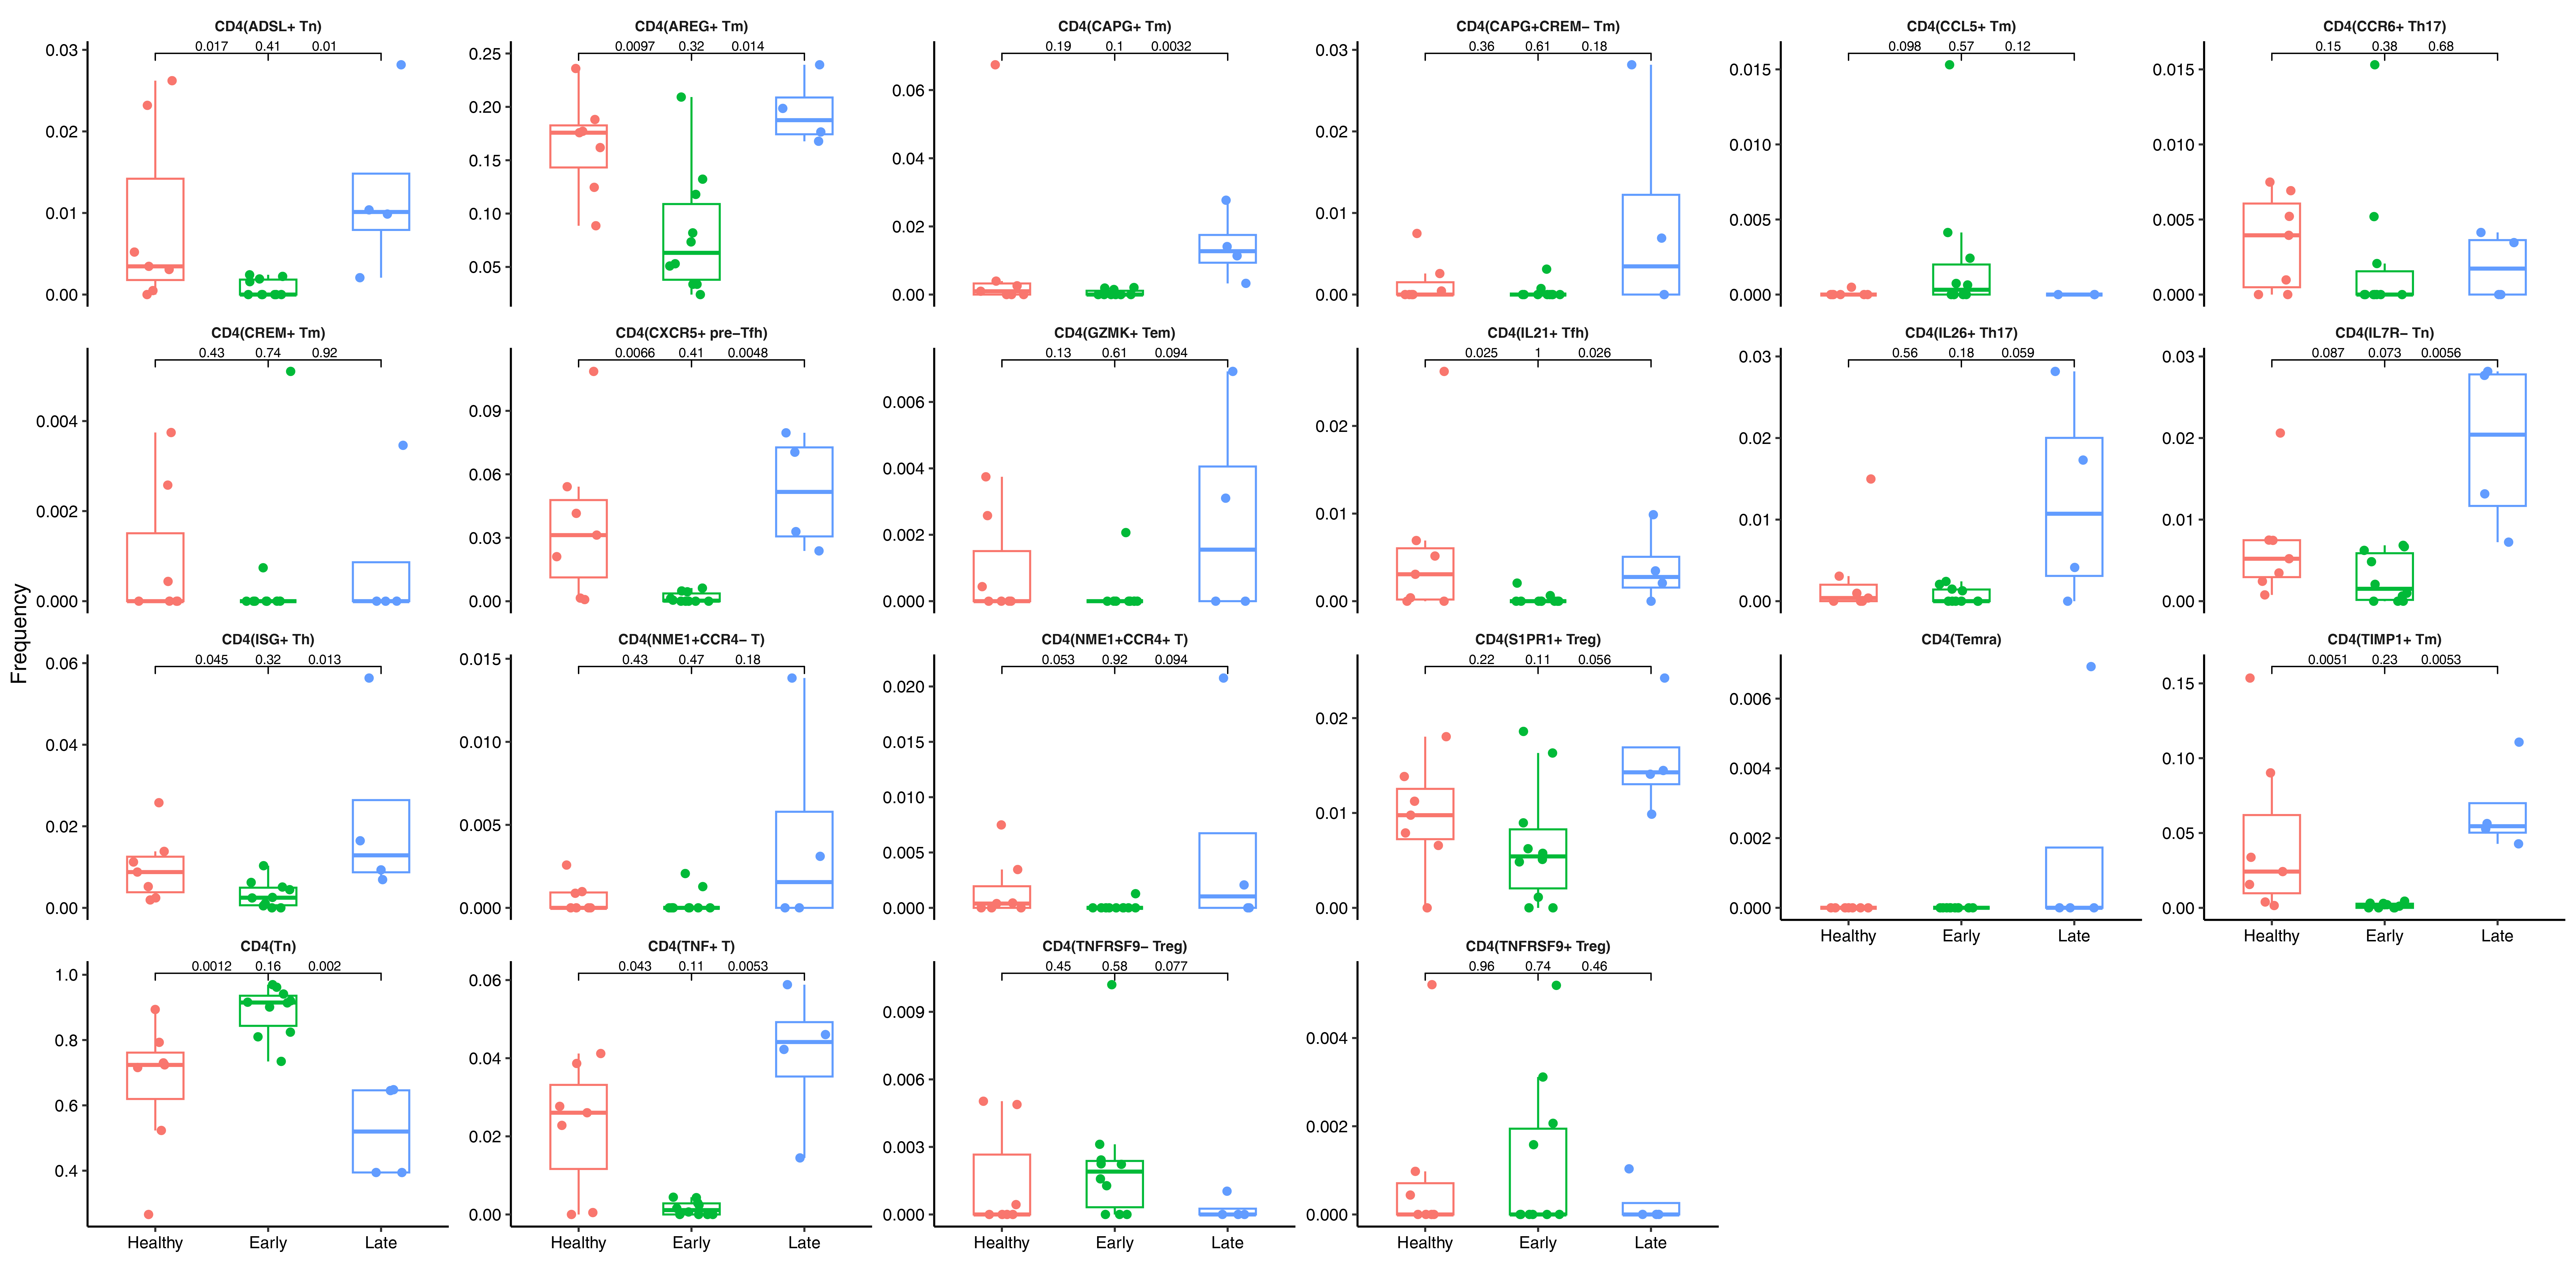


**Supplementary Figure 2:** Cell scale box plots of all CD4 T cell subpopulations with p-values calculated using a one-sided unpaired Wilcoxon test. The center line indicates the median value, and the upper and lower hinge lines indicate the 75th and 25th percentiles, respectively.


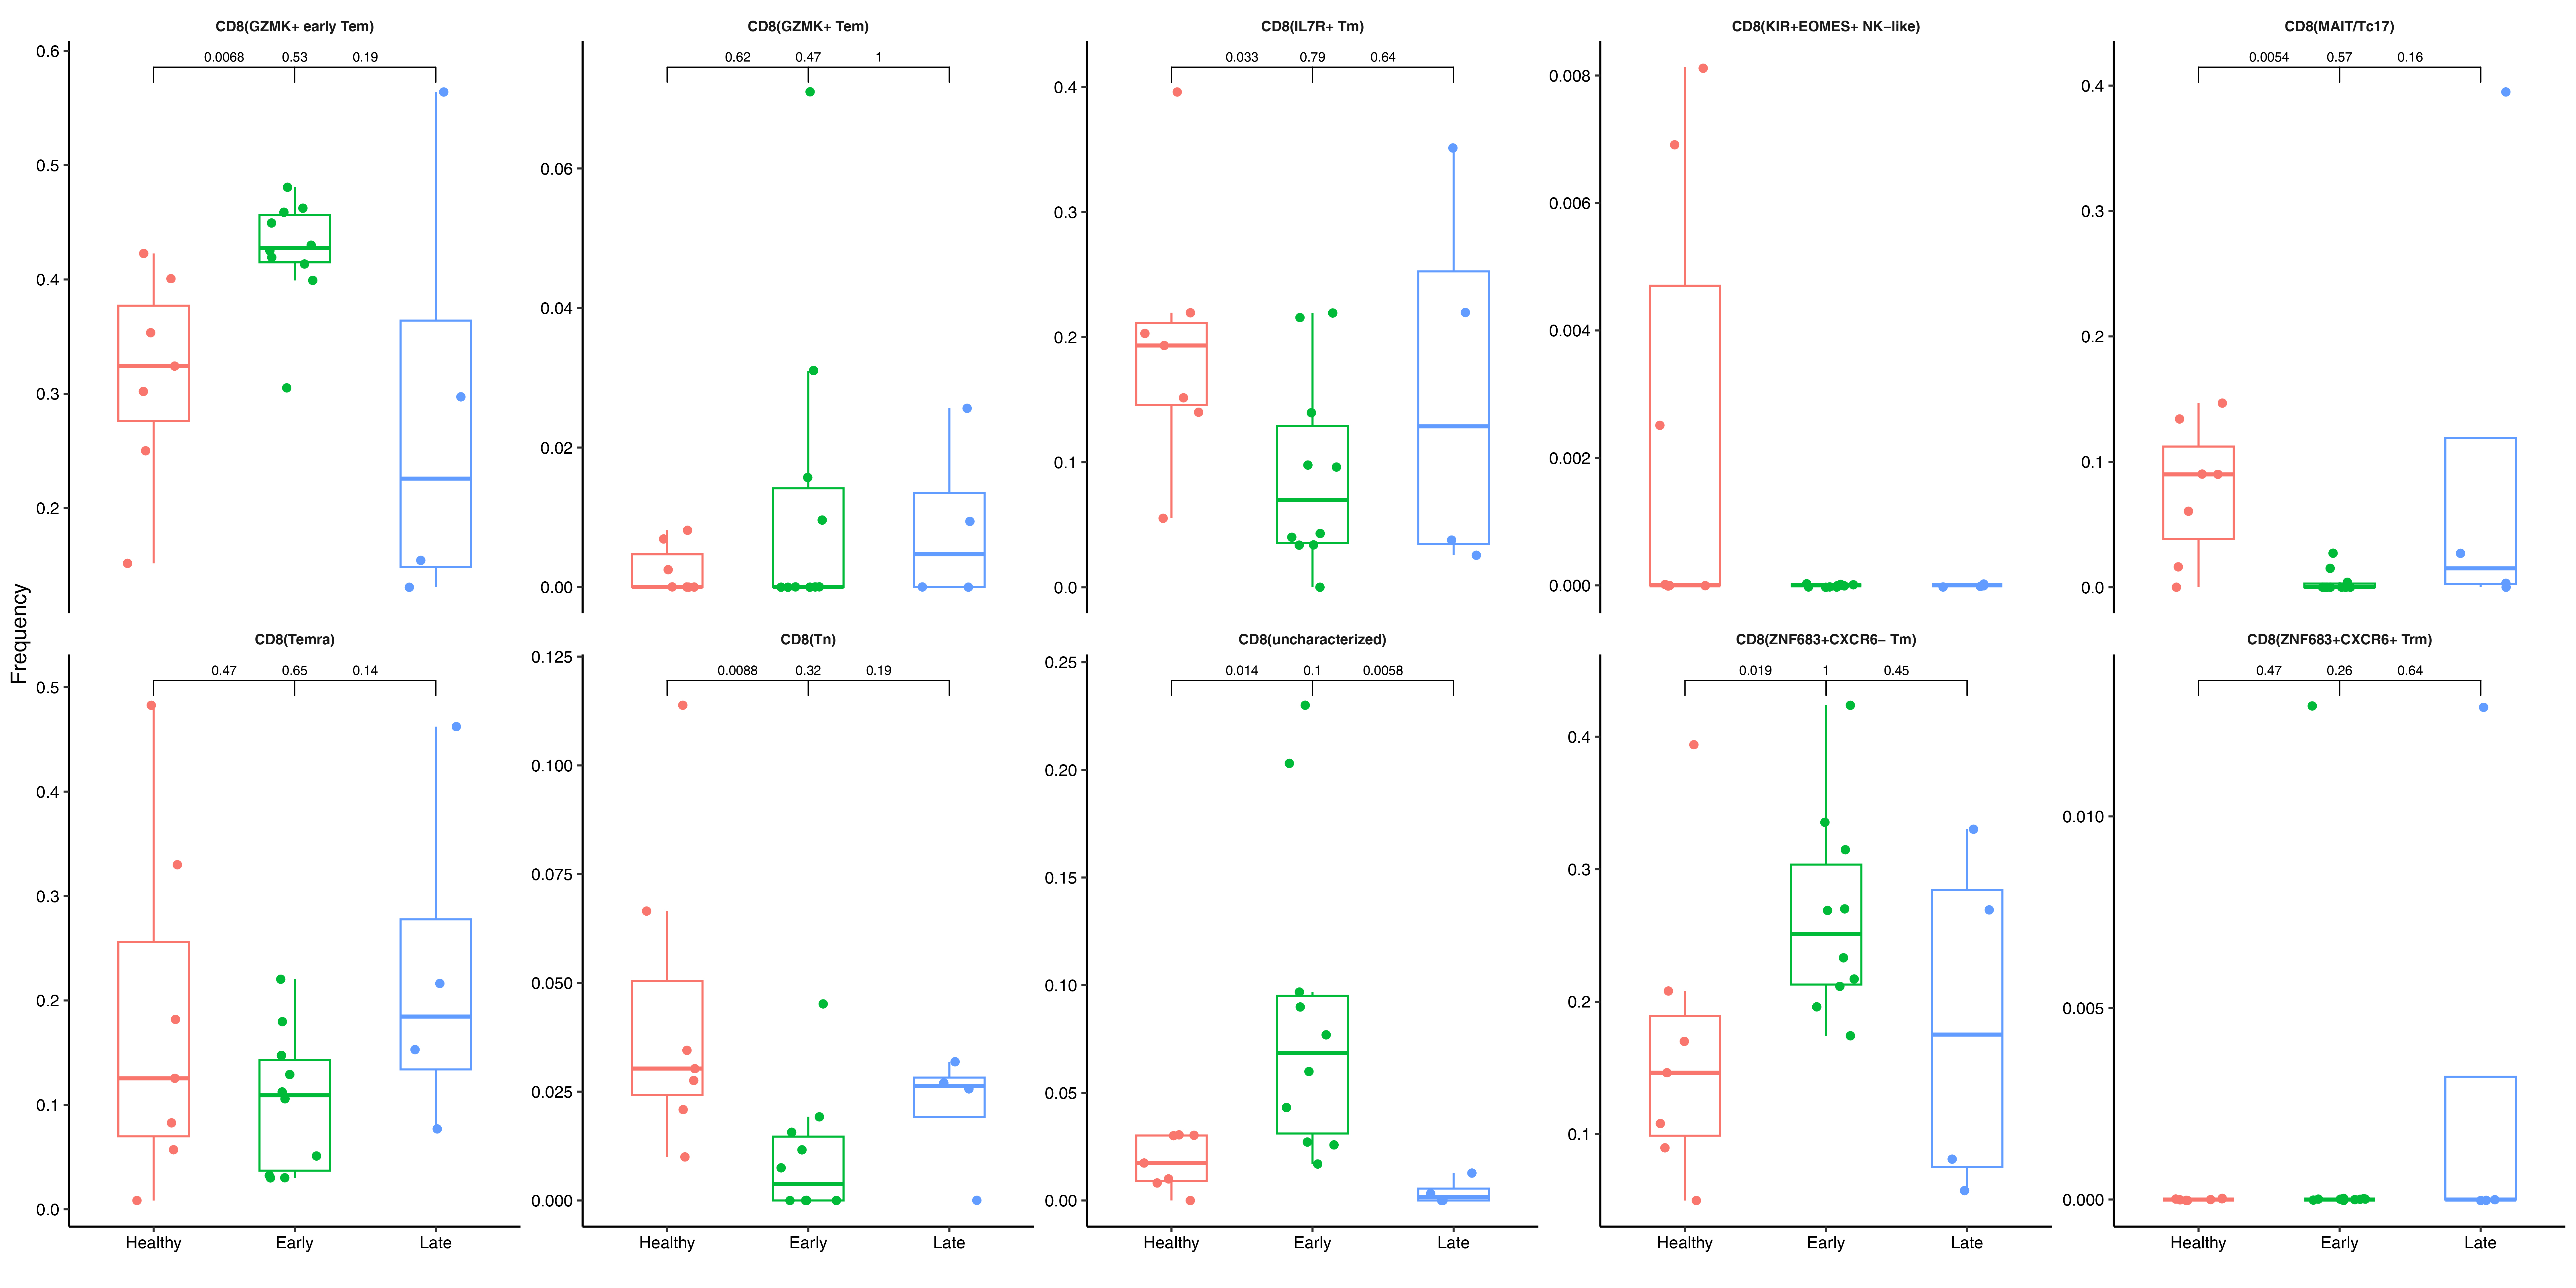


**Supplementary Figure 3:** Cell scale box plots of all CD8 T cell subsets with p-values calculated using a one-sided unpaired Wilcoxon test. The center line indicates the median value, and the upper and lower hinge lines indicate the 75th and 25th percentiles, respectively.


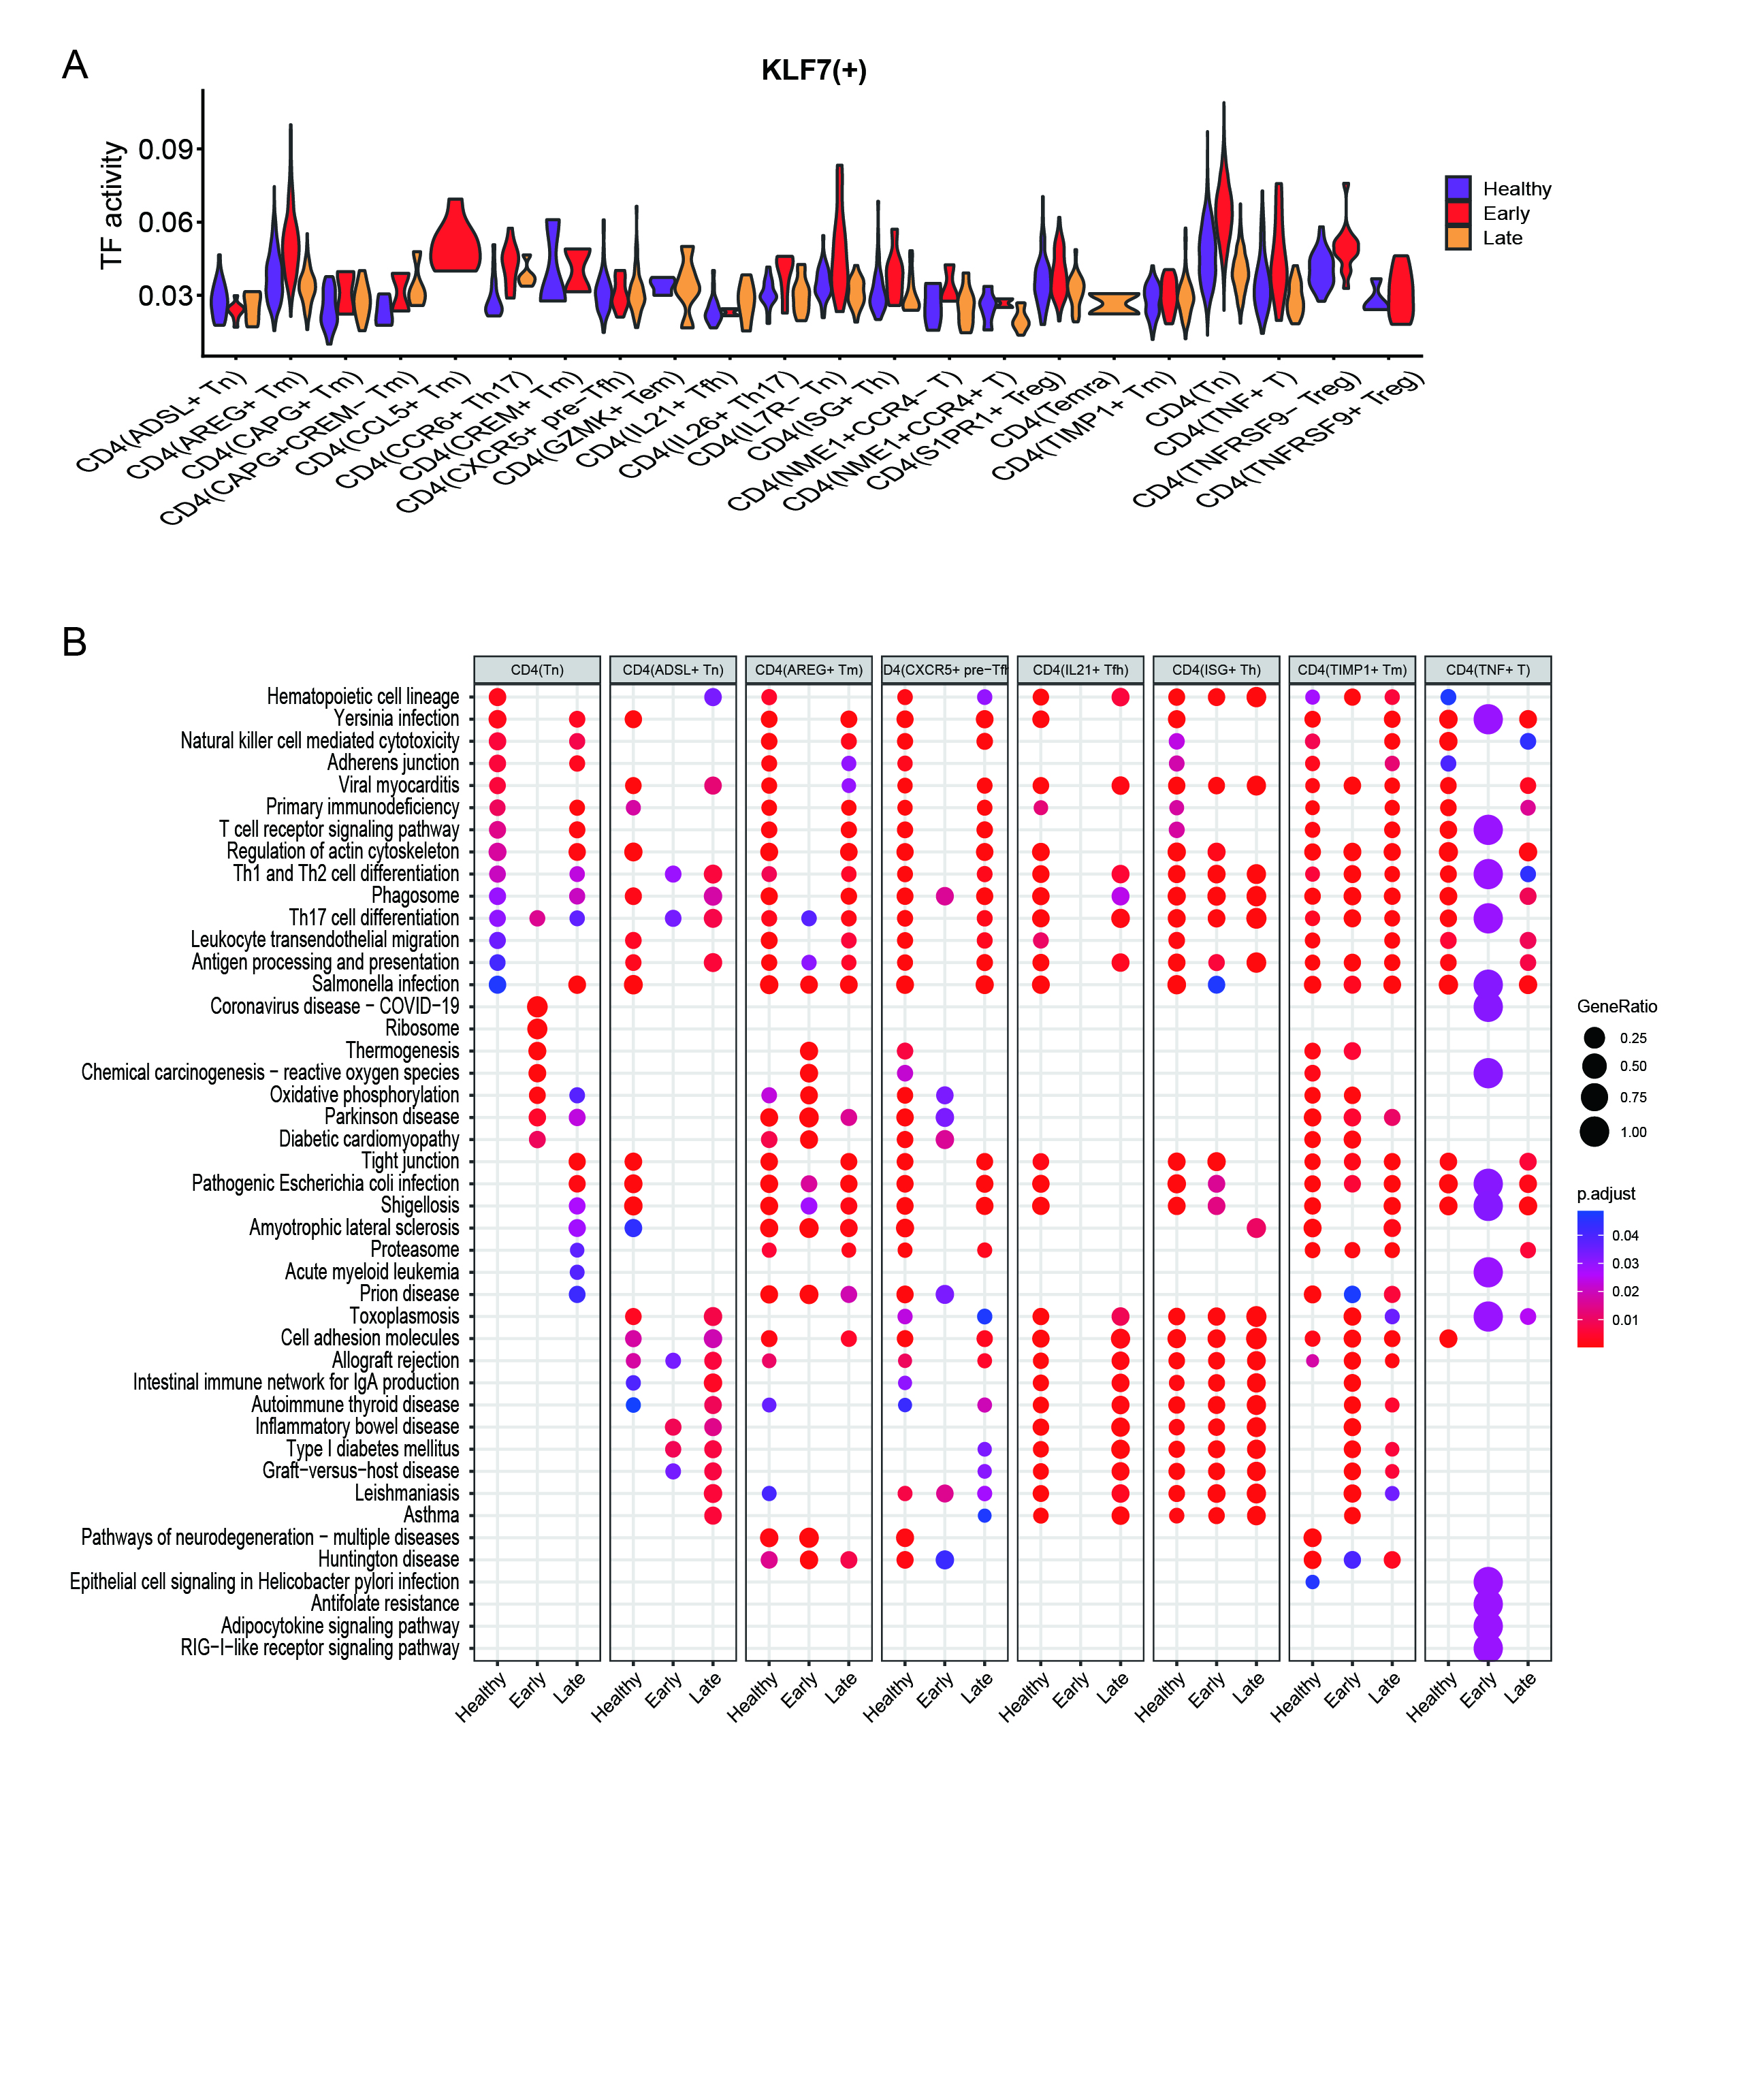


**Supplementary Figure 4:** Other specific transcription factors in CD4 Tn and GO analysis. A. CD4 Tn specific transcription factor: KLF7. B: GO analysis of statistically significant CD4 T cell subpopulations.


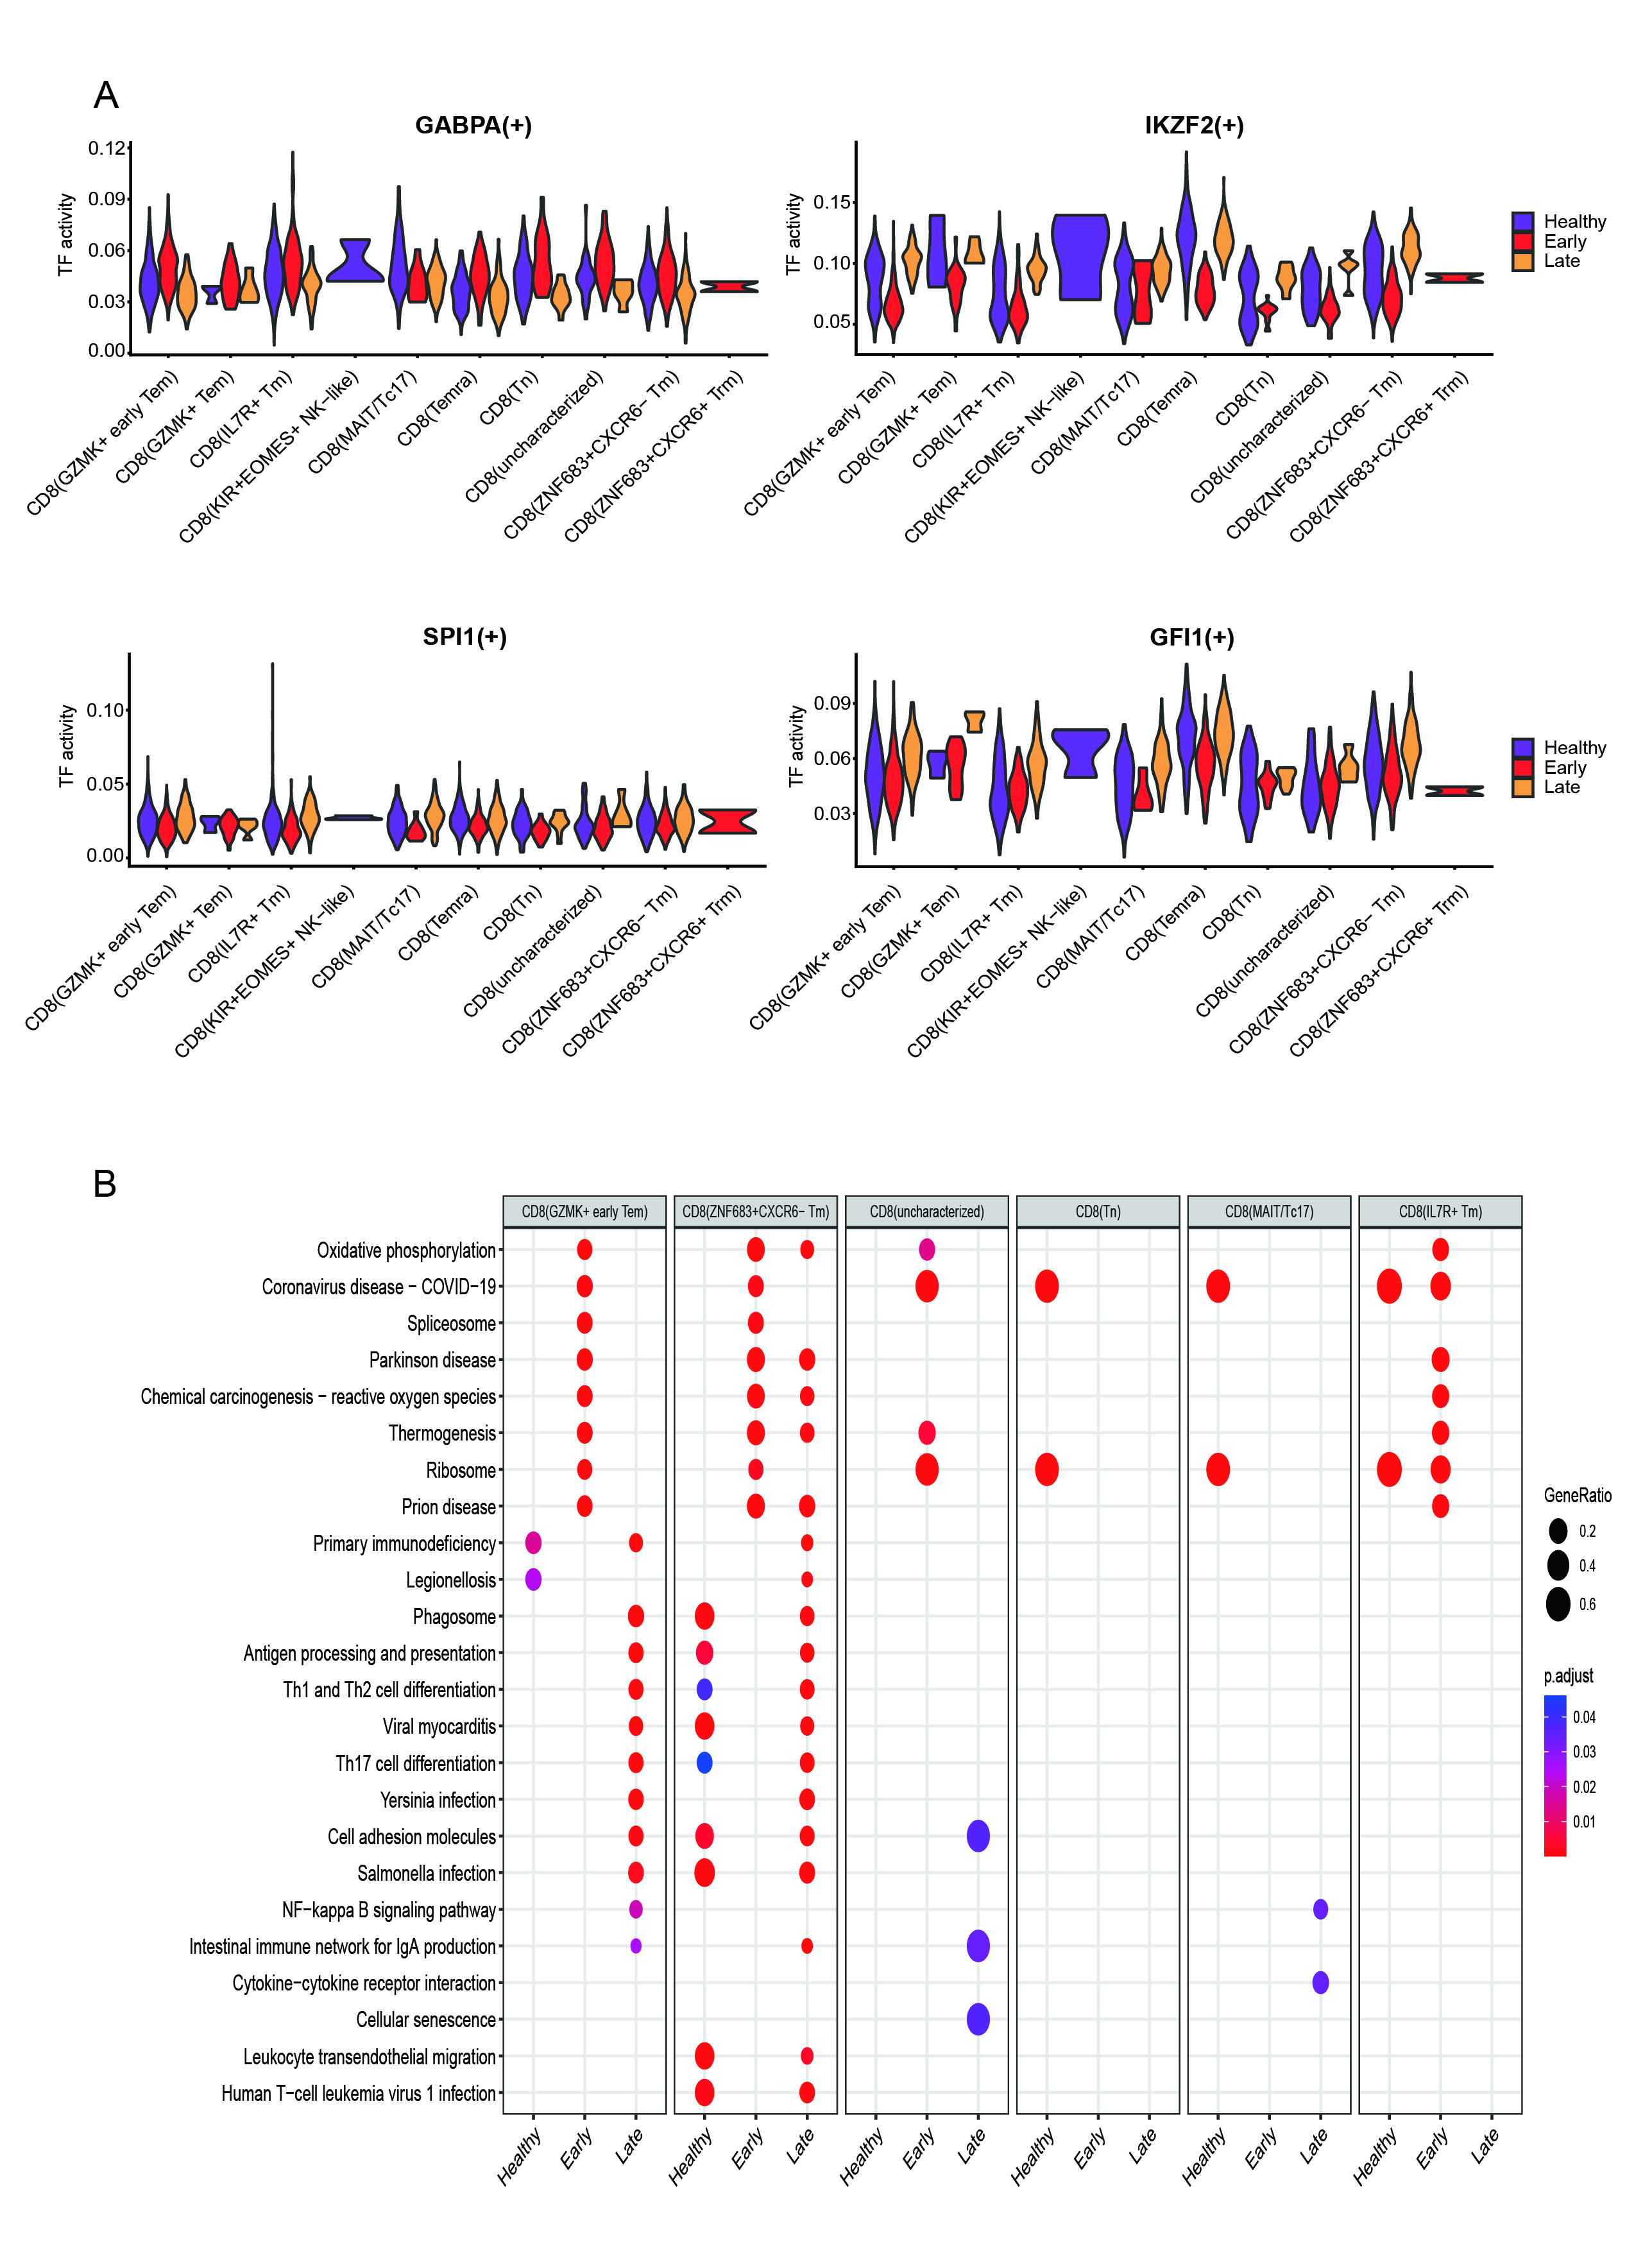


**Supplementary Figure 5:** Other specific transcription factors and GO analysis in CD8(GZMK+ early Tem), and CD8(ZNF683+CXCR6- Tm) cells. A. CD8(GZMK+ early Tem) cells specific transcription factor: KLF7; CD8(ZNF683+CXCR6- Tm) cells-specific transcription factors: IKZF2, SPI1, GFI1. B: GO analysis of statistically significant CD8 T cell subpopulations.


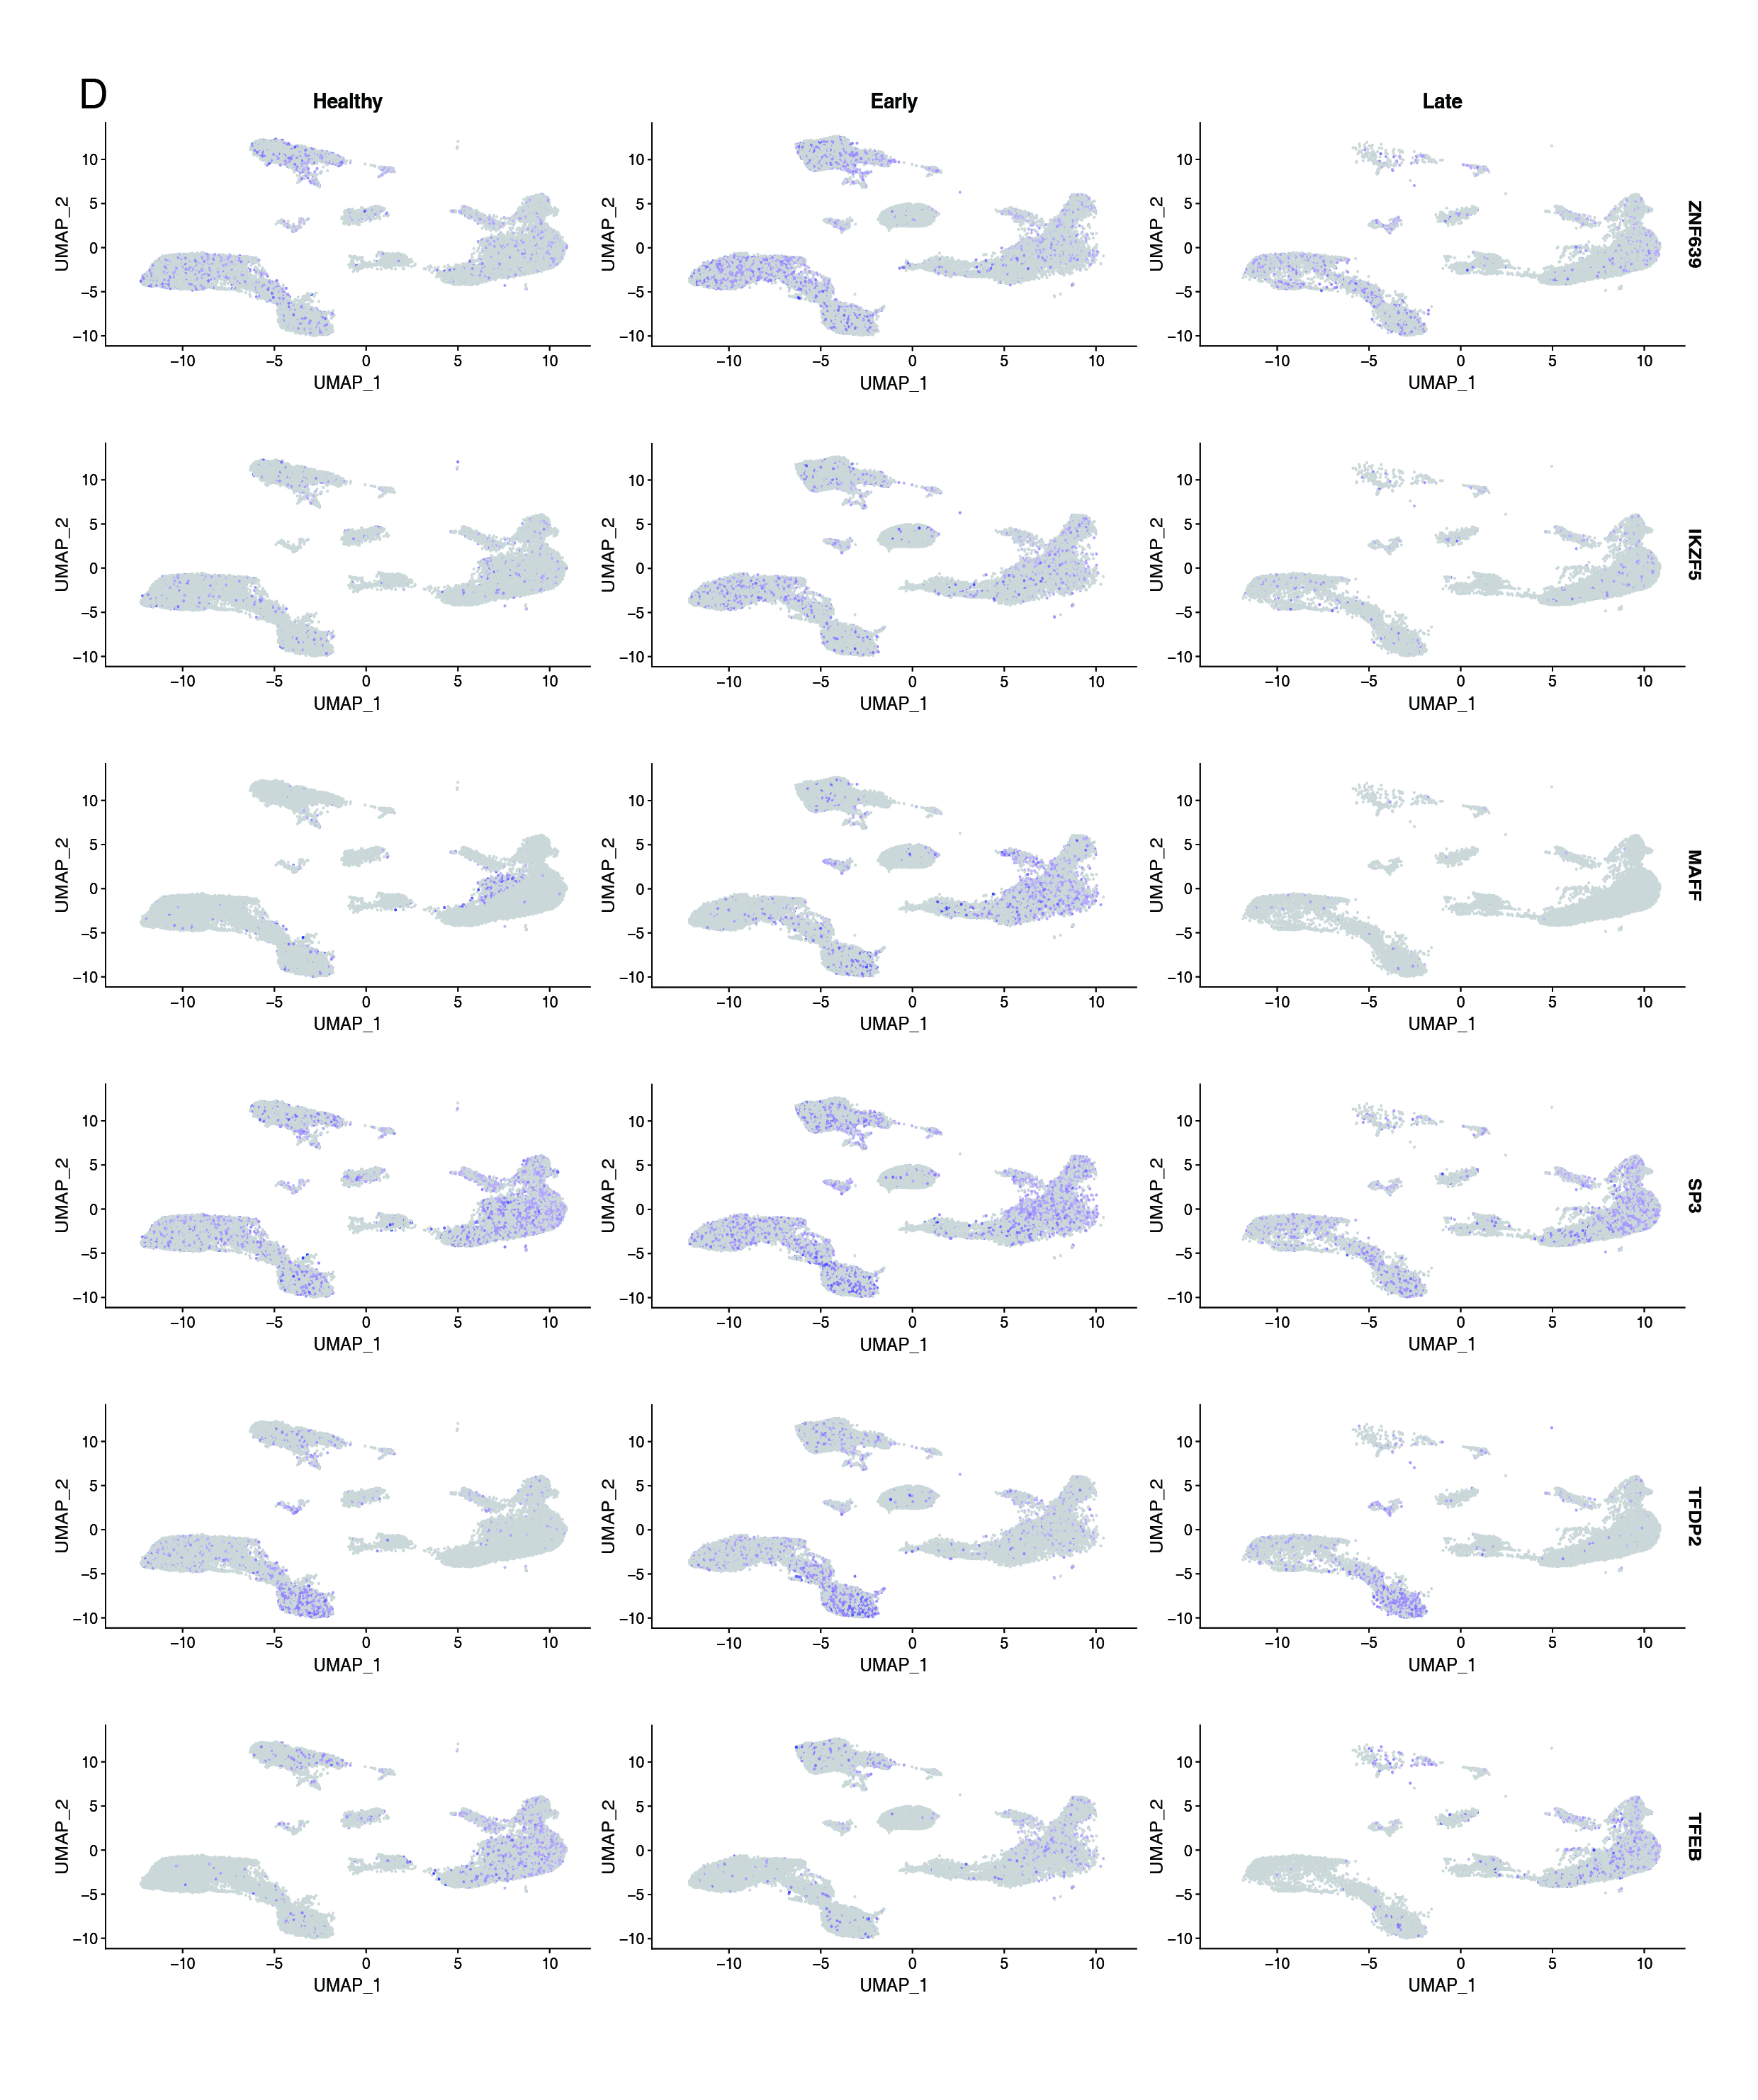


**Supplementary Figure 6:** At the gene level, UMAP of the other transcription factors(ZNF639, IKZF5, MAFF, SP3, TFDP2, TFEB).
